# Supplementary material
Source: PubMed Central journal article supplement (PMC4123641)
Supplement: supp_bgu023_Supplementary_Data.pdf [file supp_bgu023_Supplementary_Data.pdf]

## Supplementary Figure Legends

### Supplementary Figure 1. Fibulin-3 expression in lung tumors and epigenetic silencing of

***fibulin-3* in lung cancer cell lines.** (A) Additional pictures of fibulin-3 immunostaining in lung tumors on the tissue microarray (200×). Fibulin-3 was detected in the cytoplasm of the positive tumors. Scale bar, 50 μm. (B) *Fibulin-3* expression was determined by real-time RT-PCR in 6 lung cancer cell lines, 2 prostate cancer cell lines, and 2 breast cancer cell lines with or without 5-aza-dC treatment. The results are the average of three independent experiments normalized to *GAPDH* expression.

### Supplementary Figure 2. Fibulin-3 expression suppressed long-term survival of lung cancer cells.

(A) A549, (B) H1299, and (C) H460 cells were transfected with V5-tagged fibulin-3 or the control pcDNA vector. *Left*, western blot analysis of fibulin-3 at 48 hr after transfection. *Middle*, cells were plated out at 48 hr after fibulin-3 transfection and selected for G418 resistance. Colonies were visualized by crystal violet staining 11 to 14 days later. *Right*, quantification of colony numbers. Scale bar, 1 cm.

### Supplementary Figure 3. Fibulin-3 suppressed lung cancer cell invasion.

(A) Representative pictures of Matrigel analysis of parental, fibulin-3-negative (C1, C2, and C3) and fibulin-3-expressing (F1, F2, F3 and F4) H1299 cells (200×). (B) Representative pictures of Matrigel analysis of parental, fibulin-3-negative (C1 and C2) and stable fibulin-3-expressing A549 cells (F1, F2 and F3) (200×). Scale bar, 25 μm.

### Supplementary Figure 4. Correlation of *fibulin-3* promoter methylation and MMP-7 expression.

Representative fibulin-3 and MMP-7 immunostaining pictures of lung tumors with and without

*fibulin-3* promoter methylation are shown (200×). Scale bar, 50 μm.

**Supplementary Figure 5. *Fibulin-3* and *MMP-7* expression and DNA methylation in the TCGA databases.** (A) Heatmaps of *fibulin-3* and *MMP-7* mRNA expression in the TCGA lung cancer (LUNG) RNAseq (IlluminaHiSeq; N=965) dataset. Red: high expression; black: average expression; green: low expression. C1 and C2, which represent sample type and significance, respectively, are the first and second criteria for sorting the data. (B) Heatmaps of *fibulin-3* and *MMP-7* DNA methylation in the TCGA lung cancer (LUNG) HumanMethylation27 (Illumina 27K platform; N=312) dataset. Red: high methylation; white: average methylation; blue: low methylation. C1 and C2, which represent sample type and significance, respectively, are the first and second criteria for sorting the data.

**Supplementary Figure 6. Downregulation of *c-Myc* and *cyclin D1* by *fibulin-3* in lung cancer cells.**

H1299 and A549 cells were transfected with *fibulin-3* or control pcDNA vector. *c-Myc* and *cyclin D1* mRNA expression at indicated time points after transfection was analyzed by real-time RT-PCR with *GAPDH* as the internal control. The results were normalized to cells without *fibulin-3* transfection (0 hr), which were defined as 1.0.

**Supplementary Figure 7. *Fibulin-3* inhibited lung tumor growth and metastasis in mice.** (A) Pictures of parental and *fibulin-3*-expressing H1299 xenograft tumors at 27 days after inoculation. Scale bar, 5 mm. (B) Comparison of the body weight between the mice with parental and *fibulin-3*-expressing H460 tumors before sacrifice. The difference between the two groups is statistically significant (\* $P < 0.05$ , Student's t test).

# Supplementary Figure 1

A

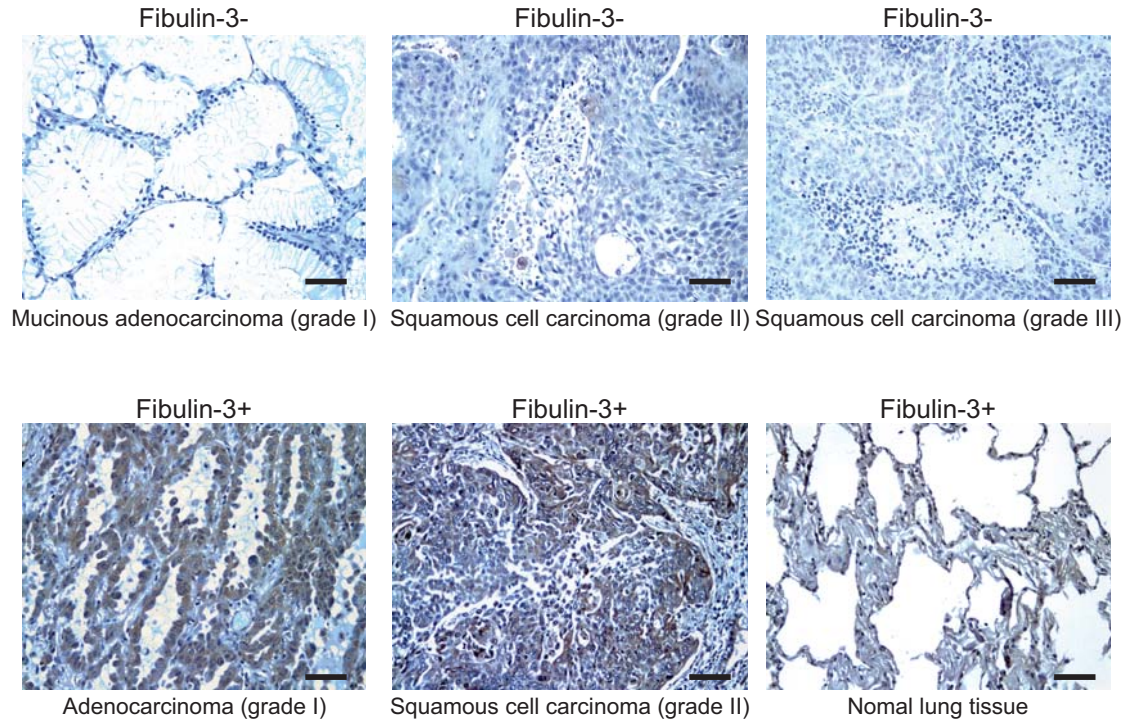

B

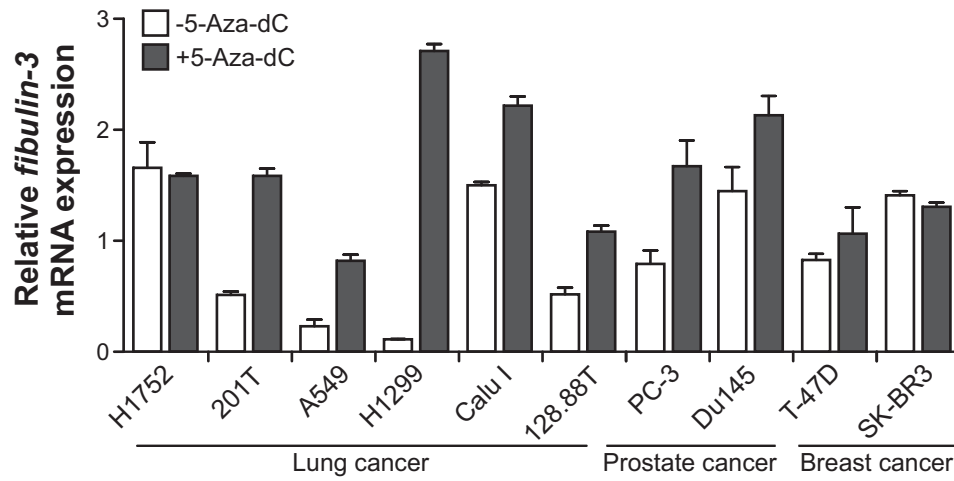

# Supplementary Figure 2

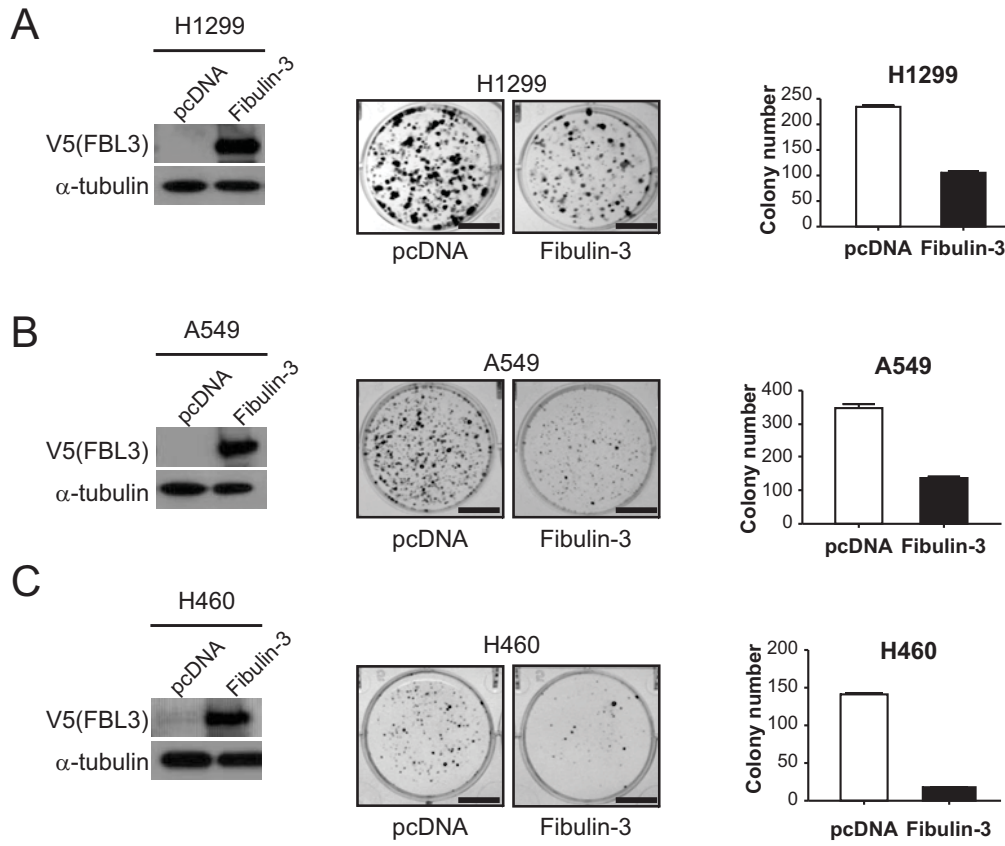

# Supplementary Figure 3

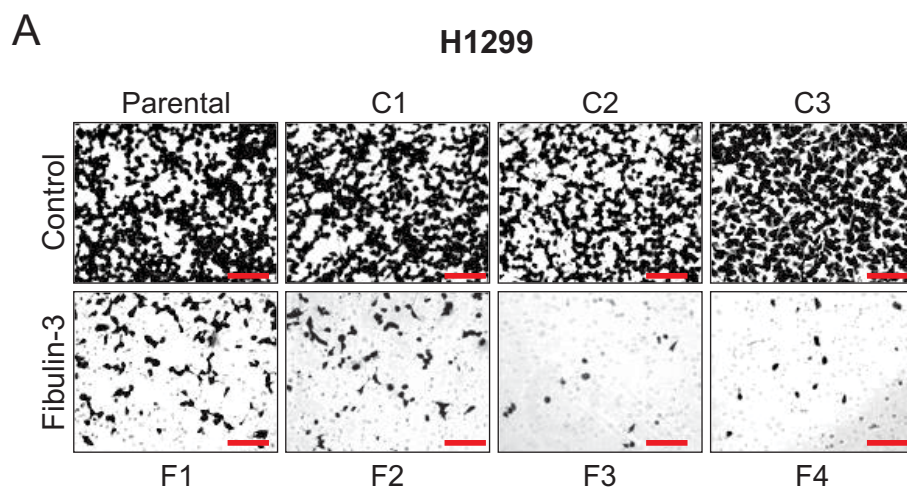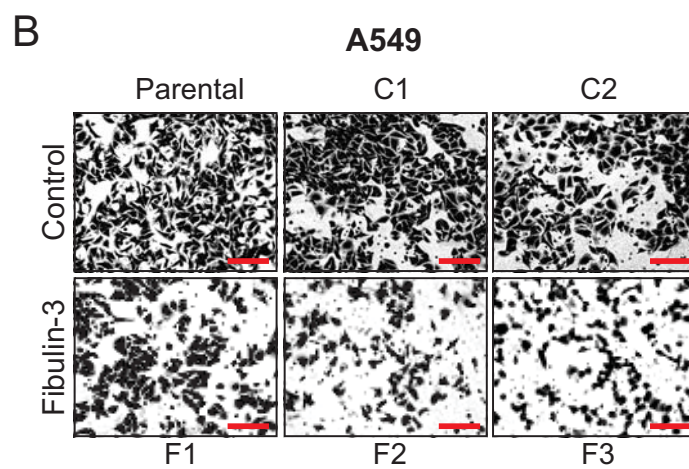

## Supplementary Figure 4

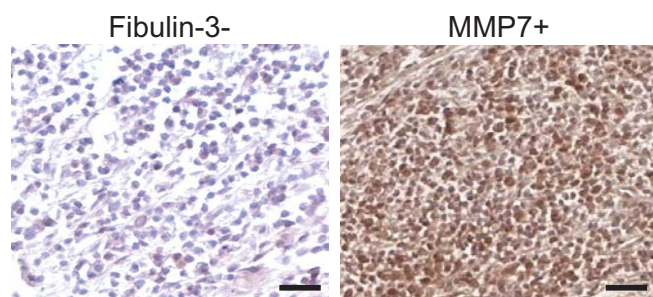

Patient #19 (*Fibulin-3* methylated)

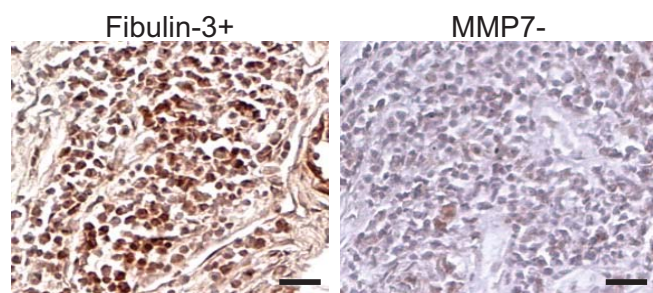

Patient #29 (*Fibulin-3* unmethylated)

# Supplementary Figure 5

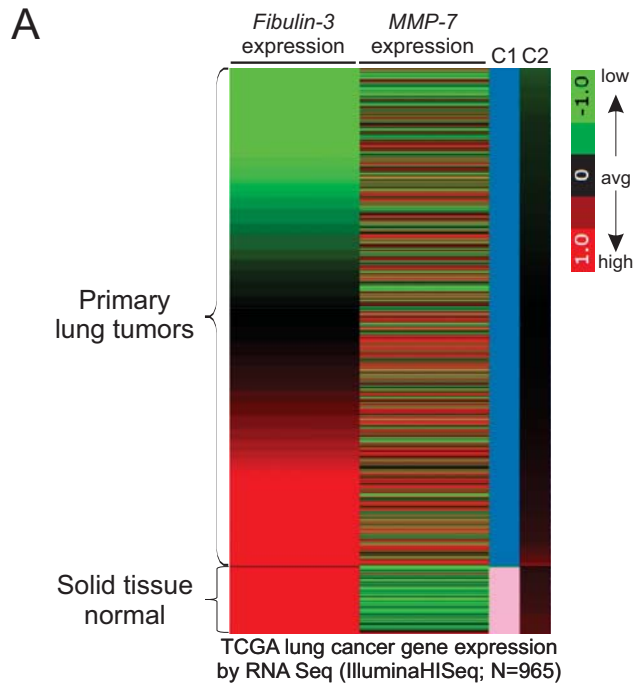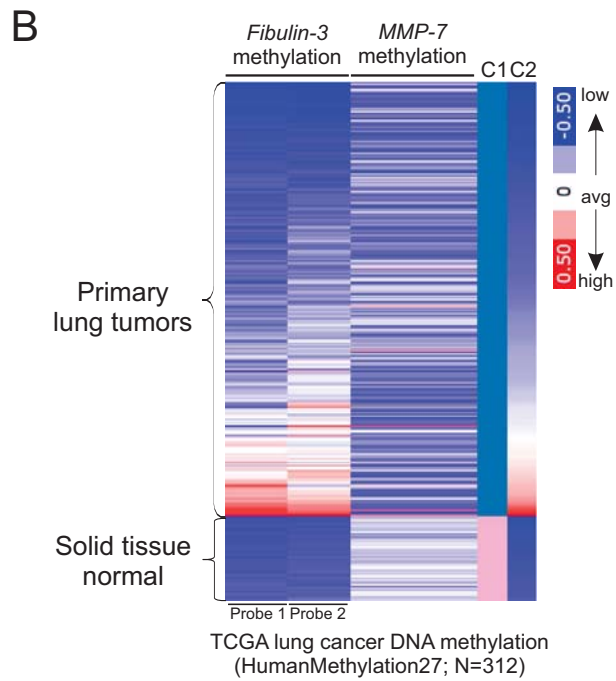

# Supplementary Figure 6

**A**

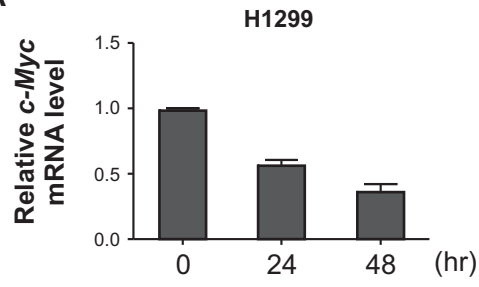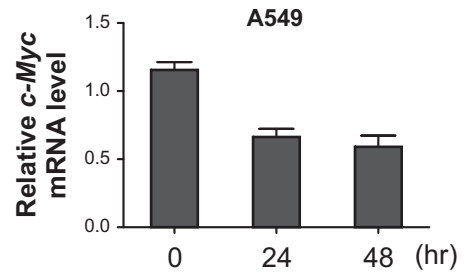

**B**

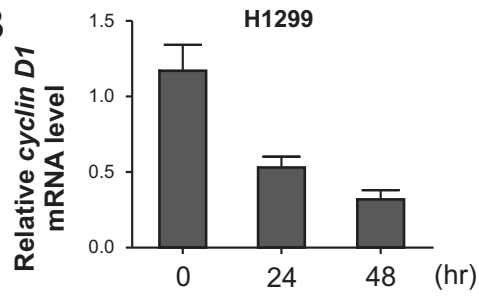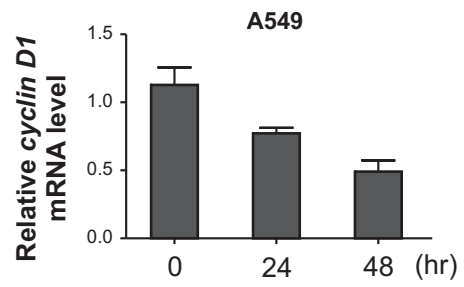



## Supplementary Figure 7

A

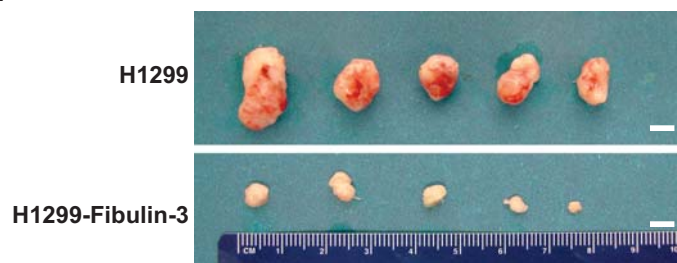

B

| Cell lines     | Body Weight (gm) |                  |
|----------------|------------------|------------------|
|                | Initial          | Final            |
| H460           | $20.62 \pm 0.78$ | $19.45 \pm 1.23$ |
| H460-Fibulin-3 | $20.89 \pm 0.63$ | $24.7 \pm 1.96$  |
| <i>P</i> value | $>0.05$          | $0.024^*$        |

**Supplementary Table 1. Fibulin-3 and MMP-7 expression in NSCLC and normal lung specimens**

| #  | Sex | Age | Diagnosis                 | Grade | Fibulin-3 expression in normal | Fibulin-3 expression in tumor | MMP-7 expression in tumor |
|----|-----|-----|---------------------------|-------|--------------------------------|-------------------------------|---------------------------|
| 1  | M   | 58  | Squamous cell carcinoma   | I     |                                | -                             | -                         |
| 2  | F   | 66  | Squamous cell carcinoma   | I     |                                | +                             | +                         |
| 3  | M   | 58  | Adenocarcinoma            | I     |                                | -                             | +                         |
| 4  | M   | 62  | Papillary adenocarcinoma  | I     |                                | -                             | -                         |
| 5  | F   | 45  | Adenocarcinoma            | I     |                                | -                             | -                         |
| 6  | M   | 60  | Adenocarcinoma            | I     |                                | +                             | -                         |
| 7  | M   | 66  | Mucinous adenocarcinoma   | I     |                                | -                             | -                         |
| 8  | F   | 53  | Adenocarcinoma            | I     |                                | +                             | -                         |
| 9  | F   | 55  | Mucinous adenocarcinoma   | I     |                                | -                             | +                         |
| 10 | M   | 68  | Adenocarcinoma            | I     | +                              | +                             | +                         |
| 11 | M   | 72  | Adenocarcinoma            | I     | +                              | +                             | -                         |
| 12 | M   | 65  | Adenocarcinoma            | I     | +                              | -                             | -                         |
| 13 | F   | 64  | Adenocarcinoma            | I     | +                              | -                             | +                         |
| 14 | F   | 42  | Adenocarcinoma            | I     | +                              | -                             | -                         |
| 15 | F   | 56  | Adenocarcinoma            | I     | +                              | -                             | +                         |
| 16 | F   | 69  | Adenocarcinoma            | I     | +                              | -                             | -                         |
| 17 | M   | 66  | Adenocarcinoma            | I     | +                              | -                             | +                         |
| 18 | M   | 56  | Adenocarcinoma            | I     | +                              | -                             | -                         |
| 19 | M   | 65  | Adenocarcinoma            | I     | +                              | +                             | -                         |
| 20 | F   | 60  | Adenocarcinoma            | I     | -                              | +                             | -                         |
| 21 | M   | 46  | Lung carcinoid            | I     | +                              | -                             | -                         |
| 22 | F   | 53  | Adenocarcinoma            | I     | +                              | +                             | -                         |
| 23 | M   | 74  | Squamous cell carcinoma   | I     | -                              | -                             | +                         |
| 24 | M   | 79  | Squamous cell carcinoma   | I     | +                              | +                             | -                         |
| 25 | F   | 59  | Squamous cell carcinoma   | I     | -                              | -                             | +                         |
| 26 | M   | 61  | Squamous cell carcinoma   | I     | +                              | +                             | -                         |
| 27 | F   | 74  | Large cell-neuroendocrine | I     | +                              | +                             | -                         |
| 28 | M   | 69  | Squamous cell carcinoma   | I     | +                              | -                             | +                         |
| 29 | M   | 72  | Large cell tumor          | I     | +                              | +                             | -                         |
| 30 | F   | 64  | Squamous cell carcinoma   | I     | +                              | -                             | +                         |
| 31 | F   | 46  | Squamous cell carcinoma   | II    |                                | -                             | -                         |
| 32 | M   | 70  | Squamous cell carcinoma   | II    |                                | -                             | -                         |
| 33 | M   | 61  | Squamous cell carcinoma   | II    |                                | -                             | -                         |
| 34 | M   | 58  | Squamous cell carcinoma   | II    |                                | +                             | +                         |
| 35 | F   | 67  | Squamous cell carcinoma   | II    |                                | -                             | +                         |
| 36 | M   | 53  | Squamous cell carcinoma   | II    |                                | +                             | -                         |
| 37 | F   | 65  | Squamous cell carcinoma   | II    |                                | -                             | +                         |
| 38 | M   | 78  | Squamous cell carcinoma   | II    |                                | -                             | +                         |
| 39 | F   | 49  | Squamous cell carcinoma   | II    |                                | -                             | +                         |
| 40 | M   | 59  | Squamous cell carcinoma   | II    |                                | -                             | -                         |
| 41 | M   | 62  | Squamous cell carcinoma   | II    |                                | -                             | +                         |

|    |   |    |                          |     |   |   |   |
|----|---|----|--------------------------|-----|---|---|---|
| 42 | F | 72 | Adenocarcinoma           | II  |   | - | + |
| 43 | F | 35 | Adenocarcinoma           | II  |   | + | - |
| 44 | M | 47 | Adenocarcinoma           | II  |   | + | + |
| 45 | F | 54 | Adenocarcinoma           | II  |   | - | - |
| 46 | F | 46 | Adenocarcinoma           | II  |   | + | - |
| 47 | F | 58 | Adenocarcinoma           | II  |   | - | + |
| 48 | M | 47 | Papillary adenocarcinoma | II  |   | - | - |
| 49 | F | 37 | Adenocarcinoma           | II  |   | - | + |
| 50 | F | 63 | Adenocarcinoma           | II  |   | - | + |
| 51 | F | 55 | Mucinous adenocarcinoma  | II  |   | + | - |
| 52 | M | 42 | Adenocarcinoma           | II  | + | - | - |
| 53 | M | 61 | Adenocarcinoma           | II  | + | - | + |
| 54 | M | 55 | Adenocarcinoma           | II  | + | - | - |
| 55 | M | 54 | Adenocarcinoma           | II  | + | - | + |
| 56 | F | 51 | Adenocarcinoma           | II  | + | - | + |
| 57 | M | 61 | Adenocarcinoma           | II  | + | + | + |
| 58 | F | 60 | Adenocarcinoma           | II  | + | - | - |
| 59 | M | 40 | Adenocarcinoma           | II  | - | - | + |
| 60 | F | 59 | Adenocarcinoma           | II  | + | - | - |
| 61 | F | 80 | Squamous cell carcinoma  | II  | + | - | + |
| 62 | M | 69 | Squamous cell carcinoma  | II  | - | + | - |
| 63 | F | 66 | Squamous cell carcinoma  | II  | - | + | + |
| 64 | M | 72 | Squamous cell carcinoma  | III |   | + | + |
| 65 | M | 58 | Squamous cell carcinoma  | III |   | - | + |
| 66 | M | 53 | Squamous cell carcinoma  | III |   | - | - |
| 67 | M | 41 | Squamous cell carcinoma  | III |   | + | - |
| 68 | M | 54 | Squamous cell carcinoma  | III |   | - | - |
| 69 | M | 50 | Squamous cell carcinoma  | III |   | - | + |
| 70 | F | 49 | Squamous cell carcinoma  | III |   | - | + |
| 71 | M | 51 | Squamous cell carcinoma  | III |   | - | - |
| 72 | M | 65 | Squamous cell carcinoma  | III |   | + | + |
| 73 | M | 72 | Squamous cell carcinoma  | III |   | - | - |
| 74 | M | 51 | Squamous cell carcinoma  | III |   | - | + |
| 75 | M | 53 | Squamous cell carcinoma  | III |   | + | + |
| 76 | M | 61 | Squamous cell carcinoma  | III |   | - | - |
| 77 | M | 47 | Squamous cell carcinoma  | III |   | - | - |
| 78 | F | 47 | Squamous cell carcinoma  | III |   | - | + |
| 79 | M | 61 | Squamous cell carcinoma  | III |   | - | - |
| 80 | M | 56 | Squamous cell carcinoma  | III |   | - | + |
| 81 | M | 52 | Adenocarcinoma           | III |   | - | + |
| 82 | M | 65 | Adenocarcinoma           | III |   | - | - |
| 83 | F | 49 | Adenocarcinoma           | III |   | - | + |
| 84 | M | 59 | Adenocarcinoma           | III |   | - | - |
| 85 | F | 50 | Adenocarcinoma           | III |   | + | - |
| 86 | M | 35 | Adenocarcinoma           | III |   | - | + |

|     |   |    |                           |     |   |   |   |
|-----|---|----|---------------------------|-----|---|---|---|
| 87  | M | 62 | Adenocarcinoma            | III |   | + | - |
| 88  | F | 50 | Squamous cell carcinoma   | III |   | - | + |
| 89  | M | 52 | Adenocarcinoma            | III | + | - | + |
| 90  | F | 54 | Adenocarcinoma            | III | + | - | + |
| 91  | M | 69 | Adenocarcinoma            | III | + | - | + |
| 92  | F | 54 | Adenocarcinoma            | III | + | + | + |
| 93  | M | 65 | Adenocarcinoma            | III | - | + | - |
| 94  | F | 36 | Adenocarcinoma            | III | + | + | + |
| 95  | F | 58 | Adenocarcinoma            | III | + | - | + |
| 96  | M | 66 | Adenocarcinoma            | III | + | + | - |
| 97  | M | 58 | Adenocarcinoma            | III | + | - | + |
| 98  | M | 60 | Adenocarcinoma            | III | - | - | - |
| 99  | M | 49 | Adenocarcinoma            | III | - | - | + |
| 100 | F | 66 | Large cell tumor          | III | + | - | + |
| 101 | F | 60 | Large cell-neuroendocrine | III | + | - | + |

---

**Supplementary Table 2. Primers for RT-PCR**

| <b>Gene</b>      | <b>Forward primer (5-3' )</b> | <b>Reverse primer (5-3' )</b> | <b>PCR product (bp)</b> |
|------------------|-------------------------------|-------------------------------|-------------------------|
| <i>Fibulin-3</i> | ATAATGAACAGCCTCAGCAGG         | TGTTGTAGCACTGCTGAGCAC         | 513                     |
| <i>MMP-1</i>     | CACAGCTTTCCTCCACTGCTGCT       | GGCATGGTCCACATCTGCTCTTG       | 397                     |
| <i>MMP-2</i>     | ACCTGGATGCCGTCGTGGAC          | TGTGGCAGCACCAGGGCA            | 448                     |
| <i>MMP-7</i>     | AAACTCCC GCGTCATAGAAAT        | CCCTAGACTGCTACCATCCG          | 397                     |
| <i>MMP-9</i>     | TGGCATCCGGCACCTCTATGGT        | GCCACTTGTCGGCGATAAAGGAA       | 371                     |
| <i>MMP-13</i>    | TCAGCAGGTTGATGCGGAGCTG        | TGACGCGAACAATACGGTTACTC       | 449                     |
| <i>TIMP-1</i>    | AGCAGGGCCTGCACCTGTGTC         | TTCAGAGCCTTGGAGCTGGTC         | 477                     |
| <i>TIMP-2</i>    | ATGAGATCAAGCAGATAAAGATG       | GGTCCTCGATGTCGAGAAACTC        | 450                     |
| <i>TIMP-3</i>    | GCTCATCGTGCTCCTGGGCAG         | CTCGGTACCAGCTGCAGTAGC         | 572                     |
| <i>GAPDH</i>     | CTCAGACACCCTGGGGAAGGTGA       | ATGATCTTGAGGCTGTTGTCATA       | 427                     |
| <i>c-Myc</i>     | CCTCAACGTTAGCTTCACCAA         | TTTGATGAAGGTCTCGTCGTC         | 373                     |
| <i>Cyclin D1</i> | CCCTCGGTGTCCTACTTCAAA         | CCAGGTCCACTTGAGCTTGT          | 339                     |
